# Supplementary material for: Nutritional Intake Differences in Combinations of Carbohydrate-Rich Foods in Pirapó, Republic of Paraguay
Source: MDPI journal article supplement (doi:10.3390/nu15051299), 2023-03-06
Supplement: s1 [file s1]

**Table S1.** Dishes observed at the one-day weighed food records (WFRs) survey in Pirapó and their nutrient compositions\*1.

| Food or dish                                            | Portion size<br>(g) | Energy<br>(kcal) | Protein<br>(g) | Lipid<br>(g) | Sodium<br>(mg) |
|---------------------------------------------------------|---------------------|------------------|----------------|--------------|----------------|
| Boiled cassava                                          | 178.5 ± 88.8        | 309.5            | 1.9            | 0.3          | 24.7           |
|                                                         | 143.8 ± 72.7        | 192.9            | 1.5            | 0.3          | 19.5           |
| Bread (pan, galleta)                                    | 126.4 ± 66.9        | 363.2            | 10.4           | 4.2          | 609            |
|                                                         | 108.0 ± 61.5        | 311.2            | 8.8            | 3.6          | 538            |
| Fried dough with wheat flour (reviro)                   | 201.7 ± 66.1        | 696.5            | 15.1           | 24.5         | 1048           |
|                                                         | 162.6 ± 62.6        | 582.4            | 12.1           | 21.3         | 808            |
| Rice, dish with rice (guiso)                            | 415.9 ± 165.2       | 594.8            | 34.1           | 21.2         | 1352           |
|                                                         | 332.5 ± 136.7       | 477.8            | 27.0           | 16.8         | 1158           |
| Hard bread (coquito)                                    | 86.1 ± 45.1         | 322.1            | 7.7            | 3.6          | 402            |
|                                                         | 92.0 ± 56.1         | 347.1            | 8.5            | 3.9          | 424            |
| Meat soup with pasta (caldo de carne)                   | 439.9 ± 148.1       | 569.3            | 37.8           | 22.4         | 1470           |
|                                                         | 391.3 ± 143.4       | 521.7            | 35.1           | 19.4         | 1390           |
| Meat spaghetti (Tallarín, fideo con carne)              | 487.8 ± 47.4        | 751.8            | 51.9           | 25.9         | 1164           |
|                                                         | 354.3 ± 69.3        | 576.5            | 40.2           | 19.8         | 861            |
| Tortilla from wheat flour                               | 267.4 ± 83.2        | 793.7            | 18.6           | 29.7         | 1343           |
|                                                         | 168.2 ± 55.2        | 546.2            | 13.2           | 19.1         | 975            |
| Cutlet or deep-fried battered beef (milanesa, marinera) | 266.5 ± 193.6       | 807.1            | 48.4           | 36.7         | 2028           |
|                                                         | 187.4 ± 80.4        | 635.9            | 32.9           | 30.5         | 1088           |
| Barbecued or oven-roasted meat (asado)                  | 274.8 ± 100.9       | 605.5            | 52.7           | 40.9         | 1402           |
|                                                         | 259.3 ± 128.3       | 525.5            | 48.2           | 34.0         | 710            |
| Fried bread (pireca)                                    | 181.9 ± 96.8        | 753.6            | 14.6           | 29.9         | 929            |
|                                                         | 143.4 ± 73.9        | 568.9            | 10.2           | 25.6         | 660            |
| Bean soup (caldo de poroto, legumbre)                   | 180.2 ± 26.3        | 482.5            | 20.0           | 8.6          | 935            |
|                                                         | 329.3 ± 122.8       | 372.1            | 14.8           | 8.5          | 822            |
| Fried dumpling with meat and boiled egg (empanada)      | 185.5 ± 85.4        | 656.1            | 26.7           | 39.0         | 1060           |
|                                                         | 185.6 ± 105.2       | 623.6            | 25.9           | 35.8         | 1046           |
| Sweet bread                                             | 249.6 ± 59.0        | 854.8            | 18.0           | 33.8         | 315            |
|                                                         | 178.0 ± 88.7        | 670.3            | 13.6           | 31.8         | 343            |
| Cornmeal dumpling soup (bori)                           | 505.1 ± 151.5       | 759.2            | 51.1           | 27.4         | 1125           |
|                                                         | 325.1 ± 53.4        | 431.7            | 27.6           | 15.7         | 700            |

Table S1. (Continued)

| Food or dish                                                         | Portion size<br>(g) | Energy<br>(kcal) | Protein<br>(g) | Lipid<br>(g) | Sodium<br>(mg) |
|----------------------------------------------------------------------|---------------------|------------------|----------------|--------------|----------------|
| Corn bread with cheese and egg (sopa paraguaya)                      | 176.5 ± 40.2        | 477.9            | 15.1           | 25.4         | 802            |
|                                                                      | 126.0 ± 49.6        | 321.9            | 10.2           | 16.8         | 586            |
| Cheese bread with cassava starch (chipa, chipa soó)                  | 164.8 ± 79.1        | 606.6            | 10.9           | 23.4         | 700            |
|                                                                      | 133.5 ± 60.0        | 507.4            | 8.9            | 20.3         | 568            |
| Locro                                                                | 417.5 ± 60.1        | 546.5            | 33.1           | 22.7         | 957            |
|                                                                      | 407.2 ± 100.4       | 528.8            | 31.5           | 21.7         | 928            |
| Cheese pancake with cassava starch (mbeyu)                           | 216.0 ± 70.8        | 937.8            | 15.1           | 39.1         | 1139           |
|                                                                      | 157.3 ± 50.0        | 661.6            | 10.2           | 26.8         | 781            |
| Pizza                                                                | 160.0 ± 8.5         | 373.1            | 13.4           | 12.1         | 847            |
|                                                                      | 255.0 ± 7.1         | 562.9            | 19.2           | 18.7         | 1354           |
| Meatball soup (albondiga)                                            | 462.0* <sup>2</sup> | 611.2            | 48.8           | 23.4         | 1538           |
|                                                                      | 356.0 ± 2.8         | 470.7            | 23.2           | 18.0         | 1083           |
| Sandwich                                                             | 779.0* <sup>2</sup> | 867.7            | 27.6           | 38.4         | 1997           |
|                                                                      | 387.0* <sup>2</sup> | 856.6            | 27.2           | 37.9         | 1971           |
| Doughnut (bollo, rosquilla)                                          | 50.0* <sup>2</sup>  | 200.0            | 3.1            | 11.2         | 222            |
|                                                                      | 75.3 ± 42.7         | 301.3            | 4.6            | 16.9         | 334            |
| Hamburger                                                            | 402.0 ± 246.1       | 1094.2           | 49.6           | 63.0         | 1710           |
|                                                                      | 258.0 ± 34.6        | 702.3            | 31.9           | 40.5         | 1097           |
| Cake (torta)                                                         | 134.0 ± 100.2       | 398.0            | 4.7            | 19.1         | 437            |
|                                                                      | 102.5 ± 76.8        | 427.2            | 6.9            | 17.4         | 159            |
| Mate tea with milk, coffee with milk, and other beverages with milk. | 270.7 ± 67.5        | 215.9            | 6.9            | 6.0          | 91             |
|                                                                      | 243.7 ± 58.3        | 184.9            | 6.4            | 5.5          | 83             |
| Dish with fish                                                       | 334.0 ± 196.4       | 417.4            | 36.9           | 26.7         | 1977           |
|                                                                      | 227.7 ± 59.7        | 309.3            | 32.5           | 17.7         | 427            |

\*<sup>1</sup> Energy and other nutrient compositions of some dishes have already been published in our previous study [21]. Reproduced with permission from Journal of the Japan Dietetic Association; published by Japan Dietetic Association, 2017.

\*<sup>2</sup> n = 1

Mean ± SD

The upper and lower lines show the average portion size and nutrient intake of males and females, respectively.
